# Supplementary material for: Sphingosine-1-phosphate promotes osteogenesis by stimulating osteoblast growth and neovascularization in a vascular endothelial growth factor–dependent manner
Source: PubMed Central journal article supplement (PMC11240155; doi:10.1093/jbmr/zjae006), 2024-01-24
Supplement: wille_et_al_supplementary_information_revison3_zjae006.pdf [file wille_et_al_supplementary_information_revison3_zjae006.pdf]

## Supplementary Information

### **Sphingosine-1-Phosphate (S1P) promotes osteogenesis by stimulating osteoblast growth and neovascularization in a vascular endothelial growth factor (VEGF)-dependent manner**

Annalena Wille<sup>1</sup>, Sarah Weske<sup>1</sup>, Karin von Wnuck Lipinski<sup>1</sup>, Philipp Wollnitzke<sup>1</sup>, Nathalie H. Schröder<sup>1</sup>, Nadine Thomas<sup>1</sup>, Melissa K. Nowak<sup>1</sup>, Jennifer Deister-Jonas<sup>1</sup>, Björn Behr<sup>2</sup>, Petra Keul<sup>1</sup>, \*Bodo Levkau<sup>1</sup>

### **Supplementary Material and Methods:**

#### *Co-culture experiments*

For co-culture experiments, BMEC were seeded in gelatine-coated cell-culture dishes and cultivated in M1168 Complete Endothelial Cell Medium (Cell Biologics, Chicago, USA) for 24 hours. Afterward, the medium was exchanged with pOB differentiation medium supplemented with Endothelial Cell Growth Supplements (Cell Biologics, Chicago, USA) and pOBs were added at a 2:5 ratio to BMECs. S1P was added daily, and images were obtained using the CKX54 Microscope (Olympus, Shinjuku, Japan) after 24 h, 48 h and 72 h of co-cultivation.

For fluorescence staining of co-cultured cells, the cells were washed twice in PBS and fixed with 4 % PFA for 20 minutes. After an additional three washes with PBS buffer, fluorescently tagged antibodies against CD31 (AF-488, Biolegend, San Diego, USA, 1:100) and OSX (AF-548, Santa Cruz Biotechnology, Dallas, Texas, 1:100) were added in a staining solution containing 0.5 % Triton X, 0.1 mM CaCl<sub>2</sub> and 2 % BSA in PBS for two hours. The cells were washed three times with PBS buffer and incubated for 5 minutes with 0.5 µg/mL DAPI solution (Thermo Fisher Scientific, Waltham, USA). After 3 washes in PBS for 5 minutes, sections are mounted using FluoromountG (Thermo Fisher Scientific, Waltham, USA). Images were acquired using a Zeiss 880 LSM confocal microscope (Carl Zeiss, Jena, Germany).

### ***Quantitative Real-Time PCR***

Gene expression analysis was performed as described in the material and methods section.

Additionally used primers are listed in Supplementary table 1.

#### ***Supplementary Table 1: Primers used for Quantitative Real-Time PCR***

| <b>Gene</b>  | <b>Product/5'-3'Sequence</b>                              | <b>Company</b>                           |
|--------------|-----------------------------------------------------------|------------------------------------------|
| <i>Bglap</i> | Fw: GCGCTCTGTCTCTCTGACCT<br>Rv: ACCTTATTGCCCTCCTGCTT      | Eurofins Genomics, Ebersberg,<br>Germany |
| <i>Sparc</i> | Fw: GTGGAAATGGGAGAATTTGAGGA<br>Rv: CTCACACACCTTGCCATGTTT  | Eurofins Genomics, Ebersberg,<br>Germany |
| <i>Postn</i> | Fw: CCTGCCCTTATATGCTCTGCT<br>Rv: AAACATGGTCAATAGGCATCACT  | Eurofins Genomics, Ebersberg,<br>Germany |
| <i>Sp7</i>   | Fw: ATGGCGTCCTCTCTGCTTG<br>Rv: TGAAAGGTCAGCGTATGGCTT      | Eurofins Genomics, Ebersberg,<br>Germany |
| <i>Spp1</i>  | Fw: AGCAAGAAACTCTTCCAAGCAA<br>Rv: GTGAGATTCGTCAGATTCATCCG | Eurofins Genomics, Ebersberg,<br>Germany |

#### ***Bone Marrow Preparations of S1P measurements***

To obtain bone marrow for S1P analysis, we retrieved one femur and removed adjacent tissue. We removed the epiphyseal regions to access the bone, which was then placed into a 0.5 mL centrifuge tube. An 18 G needle was used to make a hole at the bottom of the tube before putting it in a 1.5 mL microcentrifuge tube. After spinning the tubes at 10,000 g for 15 seconds. The bone marrow was weighted for normalization.

Finally, the bone marrow was resuspended in 200  $\mu$ L MeOH. 10  $\mu$ L of internal standard S1P was added. After overnight precipitation at -80 °C, the solution was centrifuged at 21,000 g for 10 minutes, and supernatants were collected for S1P quantification. The analysis was carried out following the prescribed procedure for plasma samples.

## Supplementary Figures:

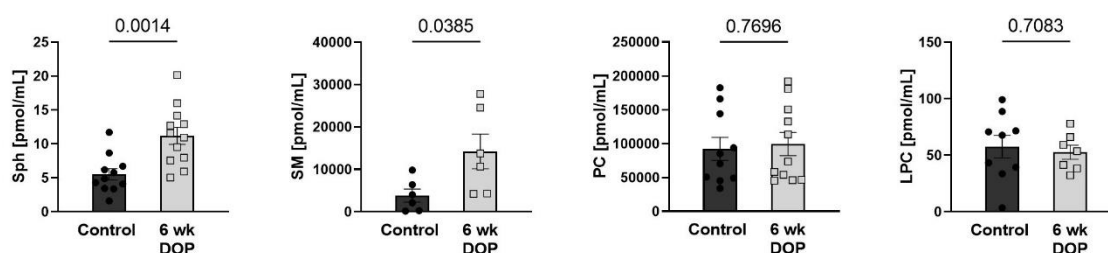

**Supplementary Figure 1: Pharmacological inhibition of the S1P-Lyase leads to the accumulation of sphingolipids in plasma.** Plasma levels of sphingosine (Sph) (n=11/12), sphingomyelin (SM) (n=6/6), phosphatidylcholine (PC) (n=10/11) and lysophosphatidylcholine (LPC) (n=9/7) of C57Bl6 control animals and after six weeks of DOP treatment (3 mg/1g/d) measured with LC-MS/MS. Data are presented as mean ± SEM, two-tailed t-test was used for statistical analysis.

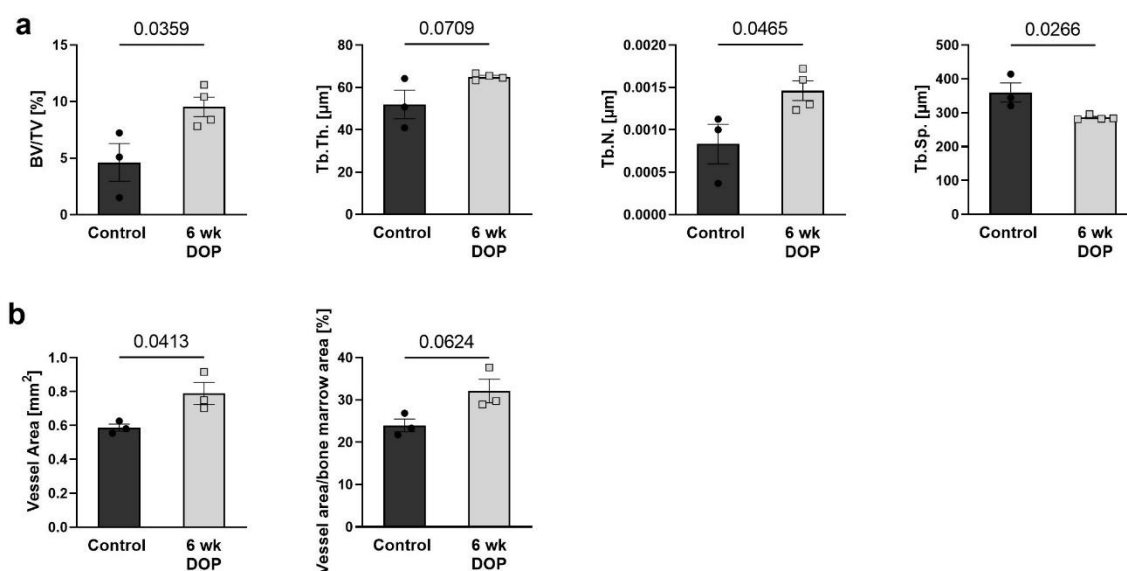

**Supplementary Figure 2: DOP treatment increases bone volume and vessel density in female mice.** (a) BV/TV, Tb.Th., Tb.N. and Tb.Sp of female C57BL/6J mice with and without 6 weeks of DOP treatment (3 mg/kg/d) (n=3/4) and (b) vessel area and vessel area per bone marrow area

assessed by endomucin staining if these animals (n=3/3). Data are presented as mean  $\pm$  SEM, two-tailed t-test was used for statistical analysis.

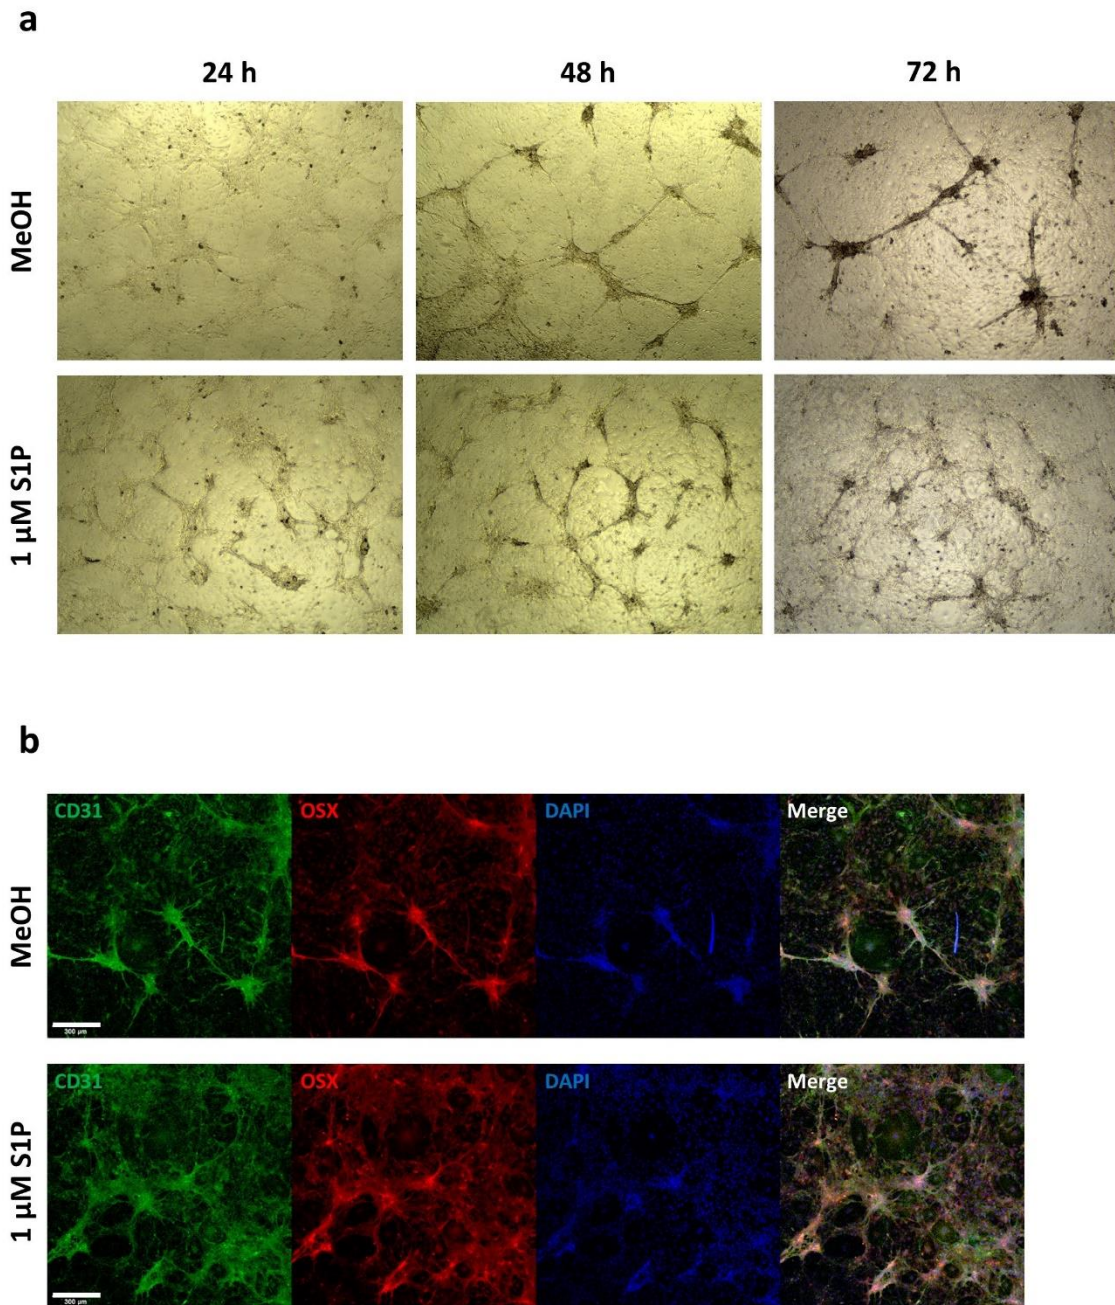

**Supplementary Figure 3: pOB and BMEC co-culture enhances the formation of vessel-like structures.** (a) Brightfield images of pOB and BMEC co-cultures after 24, 48 and 72 hours of cultivation and (b) fluorescence staining of CD31, Osterix (OSX) and DAPI after 72 hours of coculture with and without daily S1P treatment; scale bar = 300  $\mu$ m.

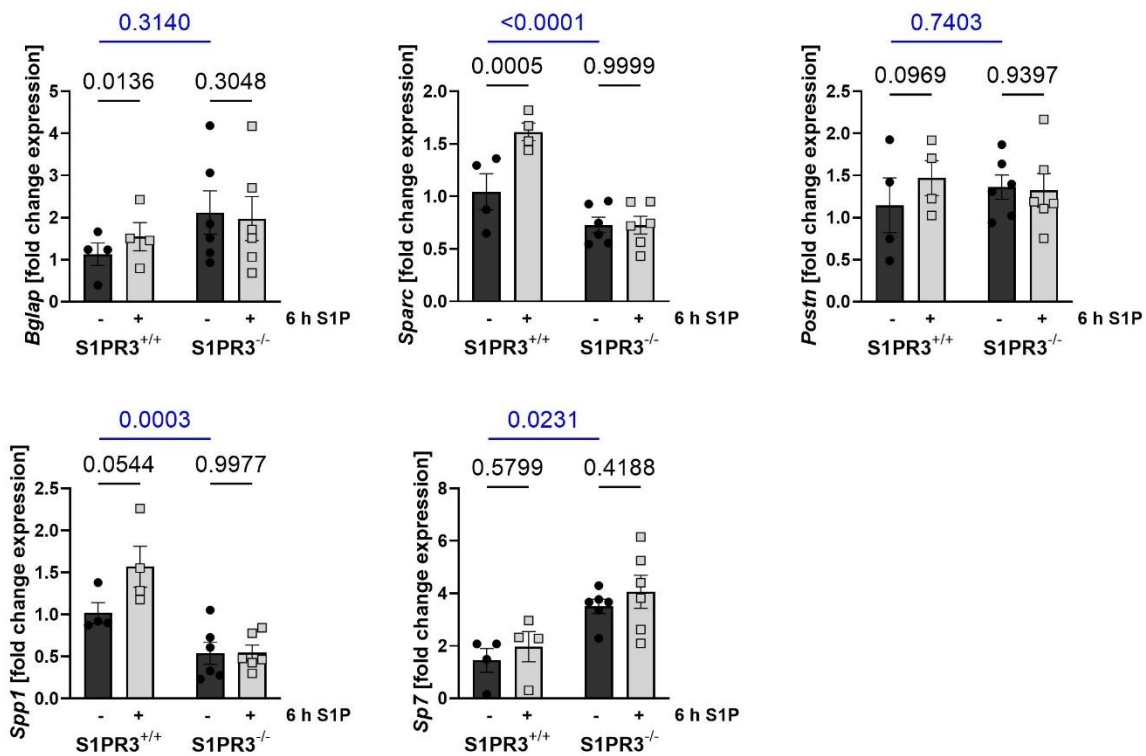

**Supplementary Figure 4: S1P treatment leads to changes in gene expression of several osteogenic markers.** Fold change gene expression levels of Osteocalcin (*Bglap*), Osteonectin (*Sparc*), Periostin (*Postn*), Osteopontin (*Spp1*) and Osterix (*Sp7*) in *S1PR3*<sup>+/+</sup> and *S1PR3*<sup>-/-</sup> osteoblasts with and without S1P treatment of 6 hours. Data are presented as mean  $\pm$  SEM, a paired two-way ANOVA (black) or unpaired two-way ANOVA (blue) was used for statistical analysis.

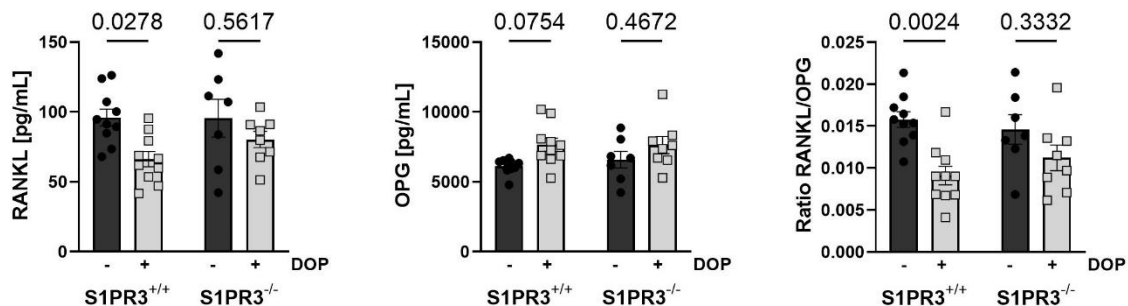

**Supplementary Figure 5: The DOP mediated decrease in RANKL and increase in OPG is S1PR3 mediated.** RANKL and OPG plasma levels and the RANKL/OPG ratio of *S1PR3*<sup>+/+</sup> control mice and after 6 weeks of DOP treatment (3 mg/kg/d) and in *S1PR3*<sup>-/-</sup> mice with the

same treatment (n=10/10/7/8). Data are presented as mean  $\pm$  SEM, and a Two-way ANOVA was used for statistical analysis.

**Supplementary Tables:**

*Supplementary Table 2: Interaction p-value, Column and Row factors determined by Two-way ANOVA corresponding to figure 3.*

| <b>Fig. 3e</b>              | <b>p-Value</b> |
|-----------------------------|----------------|
| Interaction                 | 0.0843         |
| S1P Treatment               | 0.0817         |
| VEGFa-AB Treatment          | 0.1086         |
| <b>Fig. 3i <i>Pdgfa</i></b> | <b>p-Value</b> |
| Interaction                 | 0.0809         |
| S1P Treatment               | 0.129          |
| VEGFa-AB Treatment          | 0.0530         |
| <b>Fig. 3i <i>Pdgfb</i></b> | <b>p-Value</b> |
| Interaction                 | 0.1081         |
| S1P Treatment               | 0.0063         |
| VEGFa-AB Treatment          | 0.1545         |
| <b>Fig. 3i <i>Tgfb</i></b>  | <b>p-Value</b> |
| Interaction                 | 0.0633         |
| S1P Treatment               | 0.2020         |
| VEGFa-AB Treatment          | 0.7216         |

*Supplementary Table 3: Interaction p-value, Column and Row factors determined by Two-way ANOVA corresponding to figure 4.*

|                               |                |
|-------------------------------|----------------|
| <b>Fig. 4a</b>                | <b>p-Value</b> |
| Interaction                   | 0.0486         |
| DOP Treatment                 | <0.0001        |
| Axitinib Treatment            | <0.0001        |
| <b>Fig. 4c BV/TV</b>          | <b>p-Value</b> |
| Interaction                   | 0.6406         |
| DOP Treatment                 | 0.0006         |
| Axitinib Treatment            | 0.3469         |
| <b>Fig. 4c Tb.Th.</b>         | <b>p-Value</b> |
| Interaction                   | 0.6127         |
| DOP Treatment                 | 0.1243         |
| Axitinib Treatment            | 0.3165         |
| <b>Fig. 4c Tb.N.</b>          | <b>p-Value</b> |
| Interaction                   | 0.6378         |
| DOP Treatment                 | 0.0007         |
| Axitinib Treatment            | 0.4343         |
| <b>Fig. 4c Tb.Sp.</b>         | <b>p-Value</b> |
| Interaction                   | 0.2202         |
| DOP Treatment                 | 0.0002         |
| Axitinib Treatment            | 0.1455         |
| <b>Fig. 4e Ct.Th.</b>         | <b>p-Value</b> |
| Interaction                   | 0.0058         |
| DOP Treatment                 | <0.0001        |
| Axitinib Treatment            | 0.7130         |
| <b>Fig. 4e Ct.Ar./Tt.Ar.</b>  | <b>p-Value</b> |
| Interaction                   | <0.0001        |
| DOP Treatment                 | <0.0001        |
| Axitinib Treatment            | 0.9810         |
| <b>Fig. 4h Stiffness</b>      | <b>p-Value</b> |
| Interaction                   | 0.2842         |
| DOP Treatment                 | 0.0011         |
| Axitinib Treatment            | 0.0007         |
| <b>Fig. 4h Ultimate Force</b> | <b>p-Value</b> |
| Interaction                   | 0.0054         |
| DOP Treatment                 | <0.0001        |
| Axitinib Treatment            | 0.4631         |

**Supplementary Table 4: Interaction p-value, Column and Row factors determined by Two-way ANOVA corresponding to figure 5.**

| <b>Fig. 5a <i>Vegfa</i></b> | <b>p-Value</b> |
|-----------------------------|----------------|
| Interaction                 | 0.0387         |
| S1P Treatment               | 0.0034         |
| TY-52156 Treatment          | 0.3889         |
| <b>Fig. 5a VEGFa</b>        | <b>p-Value</b> |
| Interaction                 | 0.0374         |
| S1P Treatment               | 0.0046         |
| TY-52156 Treatment          | 0.0718         |
| <b>Fig. 5b <i>Vegfa</i></b> | <b>p-Value</b> |
| Interaction                 | 0.7660         |
| S1P Treatment               | 0.0050         |
| S1PR3 KO                    | 0.5162         |
| <b>Fig. 5b VEGFa</b>        | <b>p-Value</b> |
| Interaction                 | 0.1449         |
| S1P Treatment               | 0.0564         |
| S1PR3 KO                    | 0.0004         |
| <b>Fig. 5c</b>              | <b>p-Value</b> |
| Interaction                 | 0.1449         |
| S1P Treatment               | 0.0564         |
| S1PR3 KO                    | 0.0004         |



*Supplementary Table 5: Interaction p-value, Column and Row factors determined by Two-way ANOVA corresponding to figure 6.*

|                       |                |
|-----------------------|----------------|
| <b>Fig. 6a</b>        | <b>p-Value</b> |
| Interaction           | 0.1499         |
| DOP Treatment         | 0.0034         |
| S1PR3 KO              | 0.970          |
| <b>Fig. 6b</b>        | <b>p-Value</b> |
| Interaction           | 0.0036         |
| DOP Treatment         | 0.2915         |
| S1PR3 KO              | 0.0002         |
| <b>Fig. 6d BV/TV</b>  | <b>p-Value</b> |
| Interaction           | 0.2342         |
| DOP Treatment         | <0.0001        |
| S1PR3 KO              | <0.0001        |
| <b>Fig. 6d Tb.Th.</b> | <b>p-Value</b> |
| Interaction           | 0.1929         |
| DOP Treatment         | 0.0174         |
| S1PR3 KO              | <0.0001        |
| <b>Fig. 6d Tb.N.</b>  | <b>p-Value</b> |
| Interaction           | 0.4399         |
| DOP Treatment         | 0.0006         |
| S1PR3 KO              | 0.0007         |
| <b>Fig. 6d Tb.Sp.</b> | <b>p-Value</b> |
| Interaction           | 0.7059         |
| DOP Treatment         | <0.0001        |
| S1PR3 KO              | 0.8214         |
